# Supplementary material for: Knowledge, attitude and practice about tobacco cessation among dental students: a single center study
Source: Research Square preprint supplement (doi:10.21203/rs.3.rs-8102254/v1), 2026-02-16
Supplement: Supplementary file 1 [file 170657b6a0cb1e8ad064641f.docx]

DEMOGRAPHIC DETAILS

Table 1. Responses of knowledge attitude, practice domains among participants.

|  | **Question** | **Final year**  **86 (100%)** | **Interns**  **74 (100%)** | **Pgs**  **38 (100%)** |
| --- | --- | --- | --- | --- |
| **Knowledge** | | | | |
|  | I am aware of the harmful effects of tobacco use on oral health | 81 | 74 | 38 |
|  | Does nicotine leads to cancer? | 31 | 65 | 35 |
|  | I am familiar with the various tobacco cessation methods available. | 78 | 71 | 33 |
|  | Are aware of 5A’s.? | 69 | 70 | 34 |
|  | Are you aware of 5 R’s? | 68 | 70 | 34 |
|  | Are you aware of 4 D’s? | 55 | 62 | 29 |
|  | What is smoke analyser? | 59 | 64 | 29 |
|  | What is the most effective method for helping patients quit smoking? | 48 | 52 | 26 |
|  | Which of the following is a common barrier to tobacco cessation counseling in dental settings? | 23 | 48 | 28 |
|  | How often should dental professionals screen patients for tobacco use? | 22 | 48 | 25 |
| **Attitude** | | | | |
|  | I believe that dental professionals have a responsibility to address tobacco use with their patients. | 82 | 72 | 38 |
|  | I am motivated to help patients quit tobacco. | 82 | 72 | 37 |
|  | I feel comfortable discussing tobacco cessation with patients. | 80 | 69 | 33 |
|  | I am confident in my ability to address patients' concerns and objections related to tobacco cessation. | 72 | 60 | 31 |
|  | I believe that tobacco cessation counselling is an important part of comprehensive dental care. | 56 | 52 | 31 |
|  | Should there be strict legislation for smoking ban? | 69 | 70 | 34 |
|  | Should there be mandatory training for tobacco cessation? | 68 | 70 | 34 |
| **Practise** | | | | |
|  | Screen patients for tobacco use at every visit | 86 | 74 | 36 |
|  | Provide tobacco cessation counselling to patients who use tobacco: | 74 | 71 | 36 |
|  | Refer patients to tobacco cessation resources or specialists: | 84 | 74 | 36 |
|  | Follow up with patients who are attempting to quit tobacco: | 78 | 70 | 36 |
|  | How many patient you have counselled? | 1.23 | 2.10 | 5.6 |

| **Open ended question** | | | | |
| --- | --- | --- | --- | --- |
| What are the most significant challenges you face in providing tobacco cessation counseling to your patients? | 1. Behaviour management (42%) 2. Cooperation (28%) 3. Time management (16%) 4. Follow up (14%) | 1. Behaviour management (49%) 2. Follow up(30%) 3. Cooperation (17%) 4. Time management (14%) | 1. Behaviour management (51%) 2. Communication (21%) 3. Follow up (20%) 4. Cooperation (7%) 5. Time management (1%) |
| What additional training or resources would you find helpful in improving your tobacco cessation counselling skills? | Communication and behaviour management (46%) | Communication and behaviour management (49%) | 1. Communication and behaviour management (44 %) 2. Newer advancement of cessation (36%) 3. Drug prescription (20%) |

**TABLE 2. Comparison of knowledge score**

| **Participants** | **KNOWLGE MEAN SCORE**  **(10 max score)** | **F value**  **P VALUE** | **P value** |
| --- | --- | --- | --- |
| FINAL YEAR | 7.8(0.5-0.7) | 965.1 | 0.00001* |
| INTERNS | 8.4(0.3-0.45) |
| PGs | 9.1 (0.1-0.9) |
|  | | | |
| The Tukey's HSD (honestly significant difference) procedure facilitates pairwise comparisons within your ANOVA data. | | | |
| *Pairwise Comparisons* | | HSD.05 = 0.0713 HSD.01 = 0.0899 | Q.05 = 3.4032    Q.01 = 4.2910 |
| **Final year : Interns** | M1 = 7.80 M2 = 8.40 | 0.60 | Q = 28.65 (*p* = .00000) |
| **Final year : PGs** | M1 = 7.80 M3 = 9.10 | 1.30 | Q = 62.07 (*p* = .00000) |
| **Interns : PGs** | M2 = 8.40 M3 = 9.10 | 0.70 | Q = 33.42 (*p* = .00000) |

**Table 3. Comparison Of Attitude Score**

| **PARTICIPANTS** | **ATTITUDE MEAN SCORE**  **(5 MAX SCORE)** | **F VALUE** | | **P VALUE** |
| --- | --- | --- | --- | --- |
| FINAL YEAR | 3.48 | 35.9102 | | 0.0001* |
| INTERNS | 4.36 |
| PGs | 4.91 |
| The Tukey's HSD (honestly significant difference) procedure facilitates pairwise comparisons within your ANOVA data. | | | | |
| *pairwise Comparisons* | | HSD.05 = 0.4055 HSD.01 = 0.5097 | Q.05 = 3.3834  Q.01 = 4.2526 | |
| **Final year : Interns** | M1 = 3.48 M2 = 4.36 | 0.88 | Q = 7.33 (*p* = .00001) | |
| **Final year : PGs** | M1 = 3.48 M3 = 4.91 | 1.43 | Q = 12.67 (*p* = .00000) | |
| **Interns : PGs** | M2 = 4.36 M3 = 4.91 | 0.55 | Q = 5.34 (*p* = .00093) | |

**Table 4. Comparison practice score**

| **PARTICIPANTS** | **PRACTICE MEAN SCORE**  **(5 MAX SCORE)** | | **F VALUE** | **P VALUE** |
| --- | --- | --- | --- | --- |
| FINAL YEAR | 4.30 | | 40.975 | 0.00001* |
| INTERNS | 4.72 | |
| PGs | 5 | |
|  | | | | |
| The Tukey's HSD (honestly significant difference) procedure facilitates pairwise comparisons within your ANOVA data. | | | | |
| *Pairwise Comparisons* | | HSD.05 = 0.0060 HSD.01 = 0.0075 | Q.05 = 3.3864    Q.01 = 4.2584 | | |
| **Final year : Interns** | M1 = 4.31 M2 = 4.72 | 0.41 | Q = 233.53 (*p* = .00000) | | |
| **Final year : PGs** | M1 = 4.31 M3 = 5.00 | 0.69 | Q = 391.73 (*p* = .00000) | | |
| **Interns : PGs** | M2 = 4.72 M3 = 5.00 | 0.28 | Q = 158.21 (*p* = .00000) | | |
